# Supplementary material for: Metabolic Engineering to Improve Docosahexaenoic Acid Production in Marine Protist Aurantiochytrium sp. by Disrupting 2,4-Dienoyl-CoA Reductase
Source: Frontiers journal article supplement (doi:10.3389/fmars.2022.939716), 2022-07-15
Supplement: Data_Sheet_1.docx [file Data_Sheet_1.docx]

**Additional file 1**

**
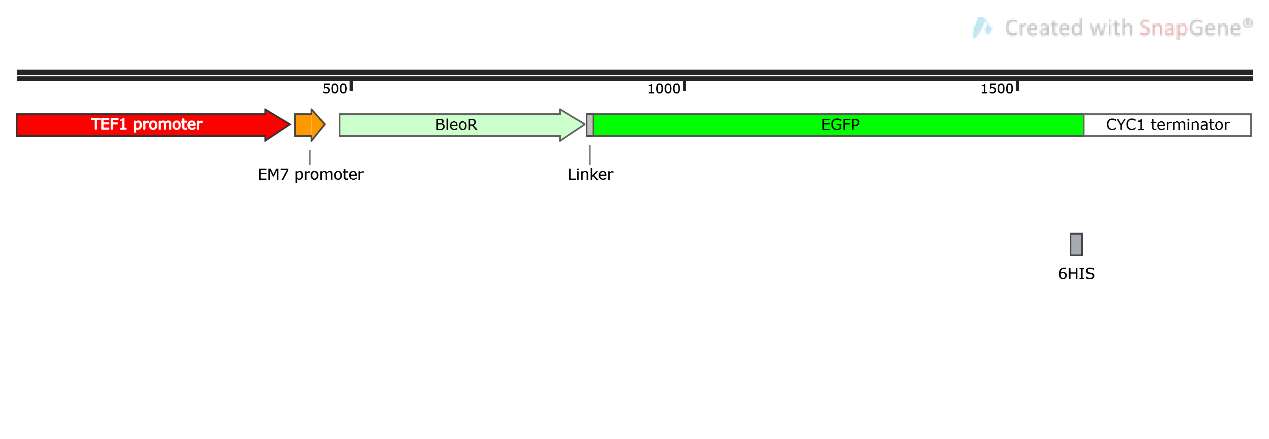
**

**Figure S1**. Map of basic frame (BF). The total length of BF is 1851 bp. Elements of BF include: TEF1 promoter, EM7 promoter, BleoR, EGFP and CYC1 terminator. BleoR, zeocin resistance gene; EGFP, enhanced green fluorescent protein.


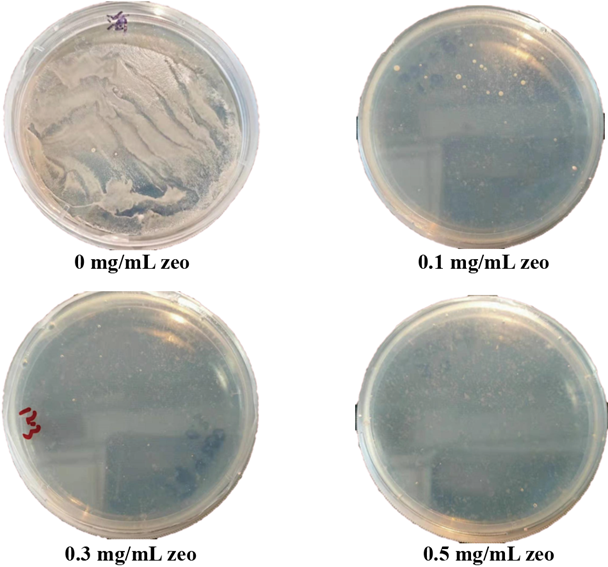


**Figure S2**. The screening of zeocin resistance concentration.


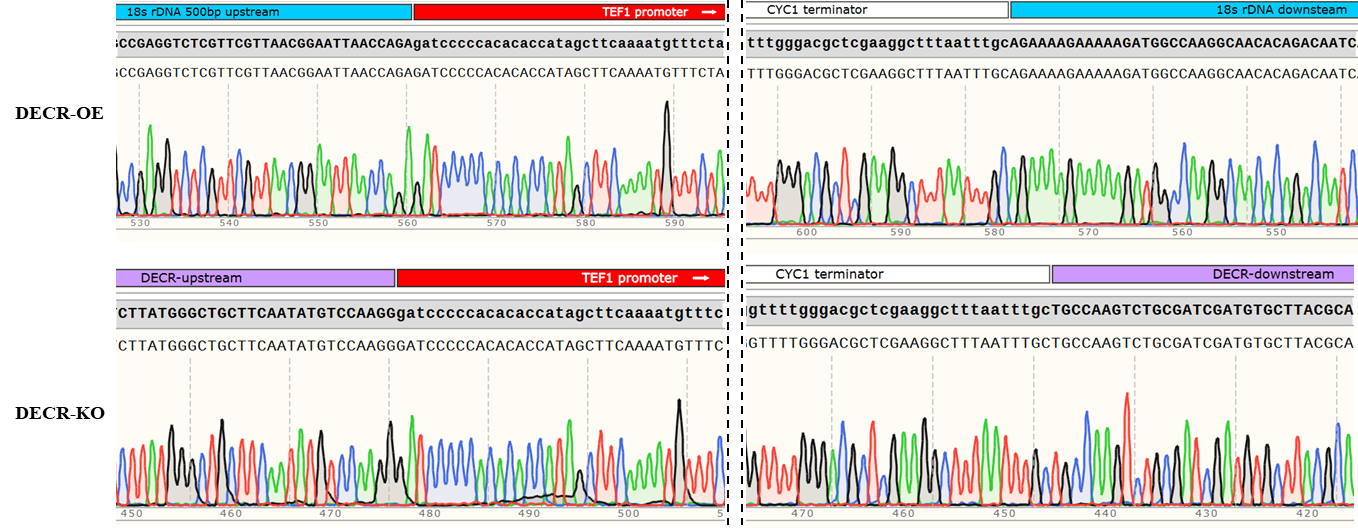


**Figure S3.** Partial fragment alignment of transformants’ genome sequencing peaks. Created with SnapGene software.
